# Supplementary material for: Fibrillogenesis from nanosurfaces: multiphoton imaging and stereological analysis of collagen 3D self-assembly dynamics
Source: Royal Society of Chemistry journal article supplement (doi:10.1039/c4sm00819g), 2014-01-01
Supplement: c4sm00819g1.pdf [file c4sm00819g1.pdf]

# Fibrillogenesis from Nanosurfaces: Multiphoton Imaging and Stereological Analysis of Collagen 3D Self-assembly Dynamics

Stéphane Bancelin, Etienne Decencière, Vaia Machairas, Claire Albert, Thibaud Coradin,  
Marie-Claire Schanne-Klein,\* Carole Aimé\*

## Supplementary Information

### 2PEF signals from other fluorophores and particles

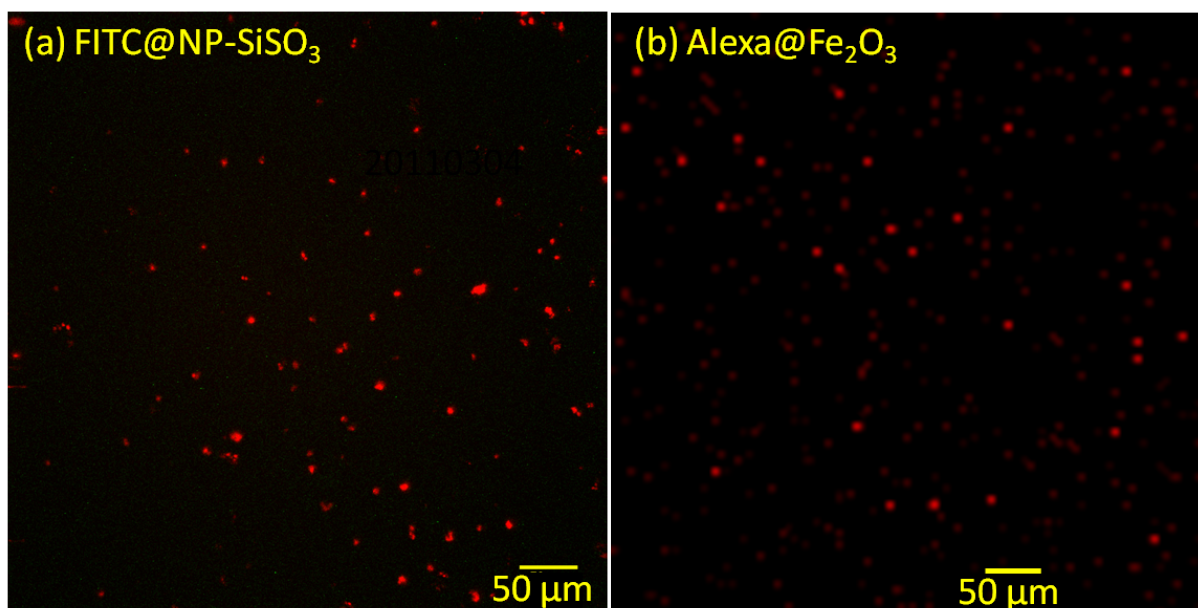

**Fig. S1. 2PEF signals from other fluorophores and particles.** (*ca.* 300 nm diameter) (a) Silica particles functionalized with fluorescein isothiocyanate (FITC), and (b) iron oxide particles loaded with Alexa Fluor® 488. This illustrates the fact that 2PEF should be widely applicable to any kind of particles and fluorophores.

## SHG photon density around particles.

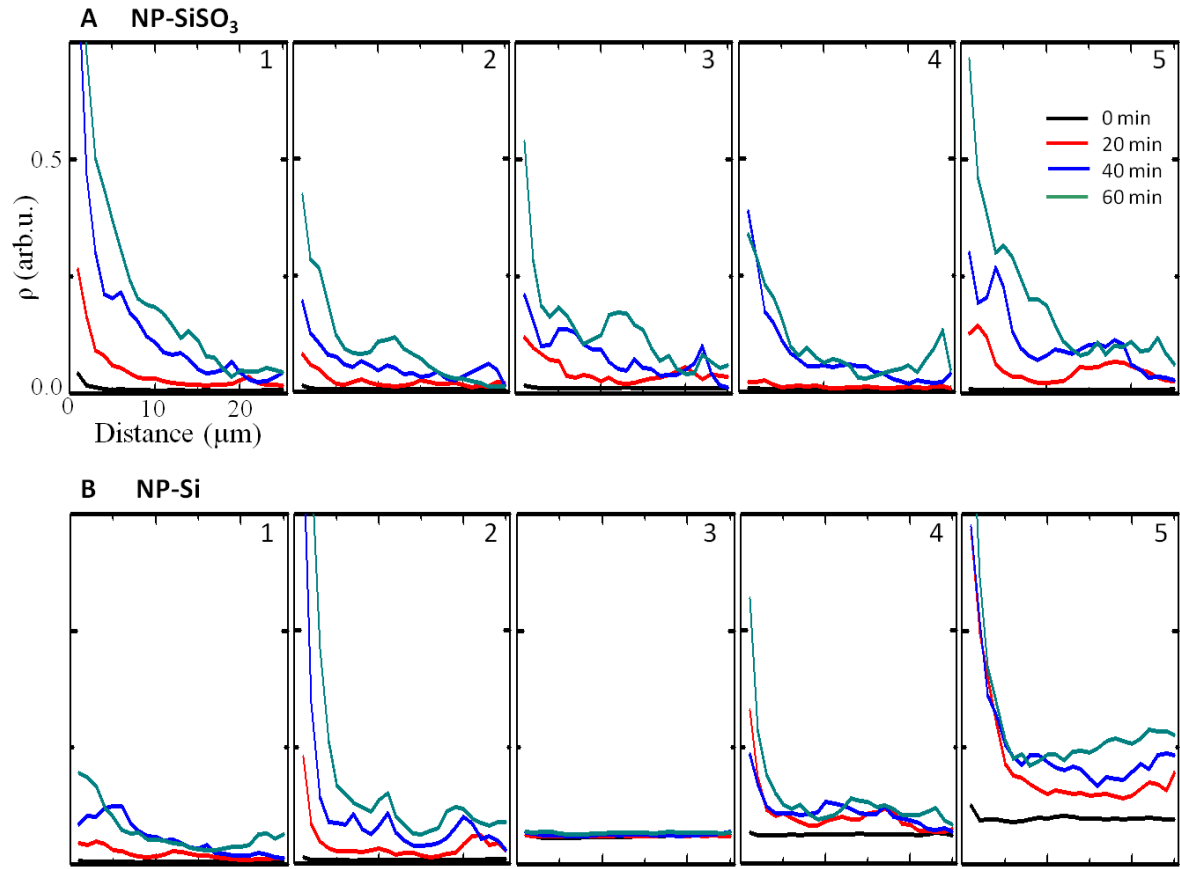

**Fig. S2. SHG photon density around particles.** The computation of  $\rho(C_j)$  has been done at 4 sequential times, for 5 samples involving NP-SiSO<sub>3</sub> particles (Fig.S1 A1-5) and 5 NP-Si samples (Fig.S1 B1-5). One can observe that SHG photon density increases with time. The evolution is highly reproducible in the case of functionalized NP-SiSO<sub>3</sub>, where the SHG photon density is always maximal close to the particle surface and exponentially decays with increasing distance. In contrast, NP-Si density curves exhibit fluctuating behaviours, sometimes without any maximum in SHG photon density or with non-monotonic variation with respect to the particle surface. This indicates that there is no systematic correlation between the presence of non-functionalized NP-Si surfaces and the course of fibrillogenesis.

## Quantitation of collagen fibrillogenesis using a statistical approach.

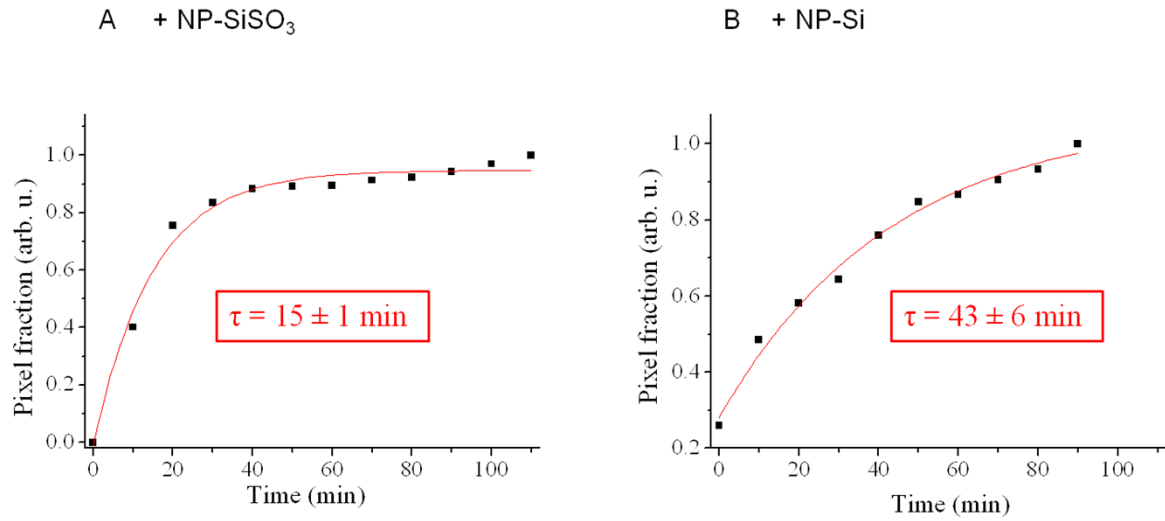

**Fig. S3. Quantitation of collagen fibrillogenesis using a statistical approach.** Fibril volume density (pixel fraction) over time for collagen fibrillogenesis in presence of (A) functionalized NP-SiSO<sub>3</sub> ( $\tau = 13 \pm 3 \text{ min}$  over three samples) and (B) bare NP-Si ( $\tau = 30 \pm 8 \text{ min}$  over three samples). Black squares and red lines correspond to experimental data and exponential fitting respectively.

## TEM photos of collagen/NP-SiSO<sub>3</sub> samples

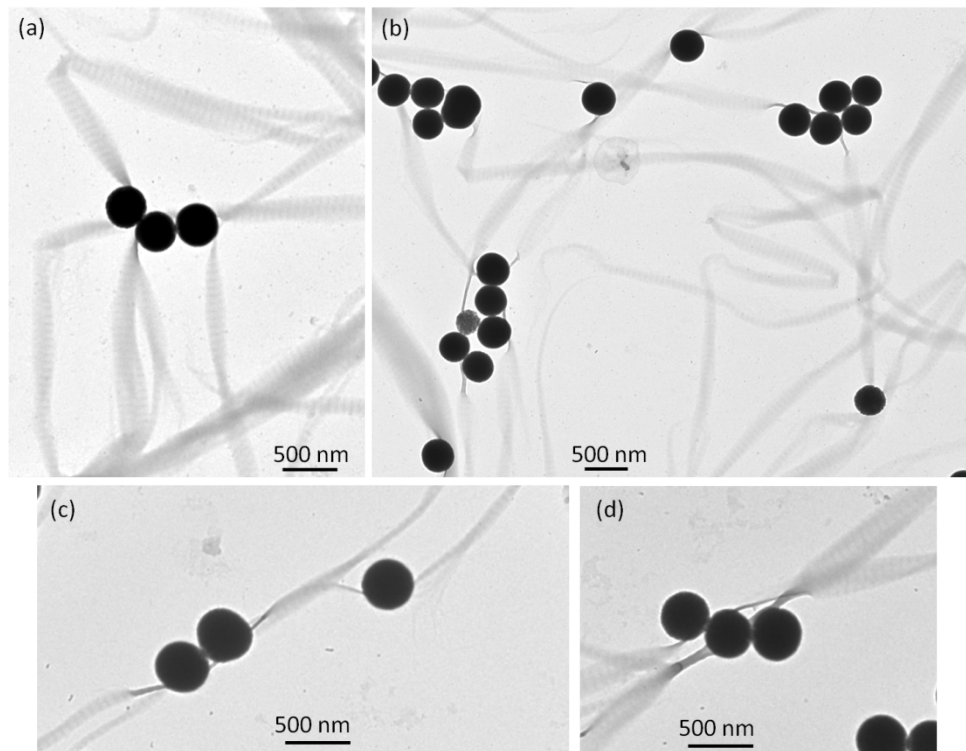

**Fig. S4. TEM photos of collagen/NP-SiSO<sub>3</sub> samples.** This set of photos shows (a-b) the presence of a discrete number of collagen fibrils with the expected banded pattern, their extent to a micron scale, and (c-d) their interaction with the particle surface observed as a dense rod of protein on the nascent collagen fibril.
